# Supplementary material for: Initial Step of Selenite Reduction via Thioredoxin for Bacterial Selenoprotein Biosynthesis
Source: MDPI journal article supplement (doi:10.3390/ijms222010965), 2021-10-11
Supplement: s1 [file s1]

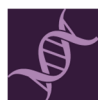

Article

# Initial Step of Selenite Reduction via Thioredoxin for Bacterial Selenoprotein Biosynthesis

Atsuki Shimizu <sup>1,†</sup>, Ryuta Tobe <sup>1,†</sup>, Riku Aono <sup>1,†</sup>, Masao Inoue <sup>1,2</sup>, Satoru Hagita <sup>1</sup>, Kaito Kiriya <sup>1</sup>, Yosuke Toyotake <sup>3</sup>, Takuya Ogawa <sup>3</sup>, Tatsuo Kurihara <sup>3</sup>, Kei Goto <sup>4</sup>, N. Tejo Prakash <sup>5</sup> and Hisaaki Mihara <sup>1,\*</sup>

<sup>1</sup> College of Life Sciences, Ritsumeikan University, 1-1-1 Nojihigashi, Kusatsu, Shiga 525-8577, Japan; 0229atk33@gmail.com (A.S.); tober0925@gmail.com (R.T.); raono@fc.ritsumei.ac.jp (R.A.); satoru.hagita@daikin.co.jp (S.H.); kirikaiw@gmail.com (K.K.); mihara@fc.ritsumei.ac.jp (H.M.)

<sup>2</sup> R-GIRO, Ritsumeikan University, 1-1-1 Nojihigashi, Kusatsu, Shiga 525-8577, Japan; mainoue@fc.ritsumei.ac.jp (M.I.)

<sup>3</sup> Institute for Chemical Research, Kyoto University, Gokasho, Uji, Kyoto 611-0011, Japan; toyotake@fc.ritsumei.ac.jp (Y.T.); ogawa.tky@mbc.kuicr.kyoto-u.ac.jp (T.O.); kurihara@scl.kyoto-u.ac.jp (T.K.)

<sup>4</sup> Department of Chemistry, School of Science, Tokyo Institute of Technology, 2-12-1 Ookayama, Meguro-ku, Tokyo 152-8551, Japan; goto@chem.titech.ac.jp (K.G.)

<sup>5</sup> School of Energy and Environment, Thapar Institute of Engineering and Technology, Patiala, Punjab 147004, India; ntejoprakash@thapar.edu (N.T.P.)

\* Correspondence: mihara@fc.ritsumei.ac.jp; Tel.: +81-(0)77-561-2732

† These authors contributed equally to this work.

## Supplementary Materials

|                                       |    |                                                                                 |   |   |   |   |     |
|---------------------------------------|----|---------------------------------------------------------------------------------|---|---|---|---|-----|
| <i>Escherichia coli</i>               | 1  | - - - - M S D K I I H L T D D S F D T D V L K A D G A I L V D F W A E W         | C | G | P | C | 36  |
| <i>Pseudomonas stutzeri</i> F2a       | 1  | - - - - M S D Y I N N V S D S S F E Q D V L Q A D G P V L V D Y W A E W         | C | G | P | C | 36  |
| <i>Nitrosomonas europaea</i>          | 1  | - - - - M S Q H I H Y V T D A S F E S E V L Q C P V P V L V D Y W A E W         | C | G | P | C | 36  |
| <i>Rhodospirillum rubrum</i>          | 1  | - - - - - - - M K Q V S D A S F E E D V L K A D G P V L V D F W A E W           | C | G | P | C | 32  |
| <i>Thermodesulfobacterium commune</i> | 1  | - - - - - - - M G A P K V T D E T F E T E V L K S P I P V L V D F W A A W       | C | G | P | C | 34  |
| <i>Helicobacter pylori</i>            | 1  | - - - - - - - M S H Y I E L T E E N F E S T I - - K K G V A L V D F W A P W     | C | G | P | C | 33  |
| <i>Thermus thermophilus</i>           | 1  | - - - - - - - M A K P I E V T D Q N F D E T L G Q H P - L V L V D F W A E W     | C | A | P | C | 34  |
| <i>Prochlorococcus marinus</i>        | 1  | - - - - - - - M S S A A A V T D S S F E Q E V L Q S D L P V L V D F W A P W     | C | G | P | C | 35  |
| <i>Mycobacterium tuberculosis</i>     | 1  | M T D S E K S A T I K V T D A S F A T D V L S S N K P V L V D F W A T W         | C | G | P | C | 40  |
| <i>Chlamydia trachomatis</i>          | 1  | - - - - - - - M V Q V V S Q E N F A D S I - - A S G L V L I D F F A E W         | C | G | P | C | 31  |
| <i>Bacillus subtilis</i>              | 1  | - - - - - - - M A I V K A T D Q S F S A E T - - S E G V V L A D F W A P W       | C | G | P | C | 32  |
| <i>Escherichia coli</i>               | 37 | K M I A P I L D E I A D E Y Q G K L T V A K L N I D Q N P G T A P K Y G I R G I |   |   |   |   | 76  |
| <i>Pseudomonas stutzeri</i> F2a       | 37 | K M I A P V L D E I A K D Y E G R L K V C K L N I D E N Q E T P P K Y G V R G I |   |   |   |   | 76  |
| <i>Nitrosomonas europaea</i>          | 37 | R M I A P L L D E I A S E Y G D R L K I A K L N I D E N Q S T P Q K Y G I R G I |   |   |   |   | 76  |
| <i>Rhodospirillum rubrum</i>          | 33 | R Q I A P A L E E L A T A L G D K V T V A K I N I D E N P Q T P S K Y G V R G I |   |   |   |   | 72  |
| <i>Thermodesulfobacterium commune</i> | 35 | R V I A P I D E L A E E F E G K V K V M K L N V D E N P V T P G K Y G I R A I   |   |   |   |   | 74  |
| <i>Helicobacter pylori</i>            | 34 | K M L S P V I D E L A S E Y E G K A K I C K V N T D E Q E E L S A K F G I R S I |   |   |   |   | 73  |
| <i>Thermus thermophilus</i>           | 35 | R M I A P I L E E I A K E Y E G K L L V A K L D V D E N P K T A M R Y R V M S I |   |   |   |   | 74  |
| <i>Prochlorococcus marinus</i>        | 36 | R M V S P I V D E I S K D F E G K I K V C K L N T D E N P N V A S Q Y G I R S I |   |   |   |   | 75  |
| <i>Mycobacterium tuberculosis</i>     | 41 | K M V A P V L E E I A T E R A T D L T V A K L D V D T N P E T A R N F Q V V S I |   |   |   |   | 80  |
| <i>Chlamydia trachomatis</i>          | 32 | K M L T P V L E A L A A E L P - H V T I L K V D I D S S P R P A E Q Y S V S S I |   |   |   |   | 70  |
| <i>Bacillus subtilis</i>              | 33 | K M I A P V L E E L D Q E M G D K L K I V K I D V D E N Q E T A G K Y G V M S I |   |   |   |   | 72  |
| <i>Escherichia coli</i>               | 77 | P T L L L F K N G E V A A T K V G A L S K G Q L K E F L D A N L A - - -         |   |   |   |   | 109 |
| <i>Pseudomonas stutzeri</i> F2a       | 77 | P T L M L F K N G N V E A T K V G A L S K S Q L A A F L D S N I - - - -         |   |   |   |   | 108 |
| <i>Nitrosomonas europaea</i>          | 77 | P T L M I F K N G N I E A T K V G A L S K S Q L T A F V D S H L - - - -         |   |   |   |   | 108 |
| <i>Rhodospirillum rubrum</i>          | 73 | P T L M I F K D G Q V A A T K I G A L P K T K L F E W V E A S V - - - -         |   |   |   |   | 104 |
| <i>Thermodesulfobacterium commune</i> | 75 | P T L I I F K N G E P V E V I V G A V S K N T I V N A L N K V L A - - -         |   |   |   |   | 107 |
| <i>Helicobacter pylori</i>            | 74 | P T L L F T K D G E V V H Q L V G V Q T K V A L K E Q L N K L L G - - -         |   |   |   |   | 106 |
| <i>Thermus thermophilus</i>           | 75 | P T V I L F K D G Q P V E V L V G A Q P K R N Y Q A K I E K H L P A T A         |   |   |   |   | 110 |
| <i>Prochlorococcus marinus</i>        | 76 | P T L M I F K G G Q K V D T V V G A V P K A T L S G T I S K H L - - - -         |   |   |   |   | 107 |
| <i>Mycobacterium tuberculosis</i>     | 81 | P T L I I F K D G Q P V K R I V G A K G K A A L L R E L S D V V P N L N         |   |   |   |   | 116 |
| <i>Chlamydia trachomatis</i>          | 71 | P T L I L F K D G K E V E R S V G L K D K D S L I K L I S K H Q - - - -         |   |   |   |   | 102 |
| <i>Bacillus subtilis</i>              | 73 | P T L L V L K D G E V V E T S V G F K P K E A L Q E L V N K H L - - - -         |   |   |   |   | 104 |

**Figure S1.** Amino acid sequence alignment of thioredoxin homologs from various bacterial phyla. Sequences were aligned using Muscle [1]. The amino acid sequences used in this alignment were obtained from protein databases with locus tags of b3781

---

(*Escherichia coli*), PszF2a\_05700 (*Pseudomonas stutzeri* F2a), NE1034 (*Nitrosomonas europaea*), Rru\_A3433 (*Rhodospirillum rubrum*), HL41\_06235 (*Thermodesulfobacterium commune*), HP\_0824 (*Helicobacter pylori*), TT\_C1385 (*Thermus thermophilus*), Pro\_1139 (*Prochlorococcus marinus*), Rv3914 (*Mycobacterium tuberculosis*), CT\_539 (*Chlamydia trachomatis*), and BSU28500 (*Bacillus subtilis*). Yellow highlight, catalytic Cys residues. Asterisks, conserved residues.

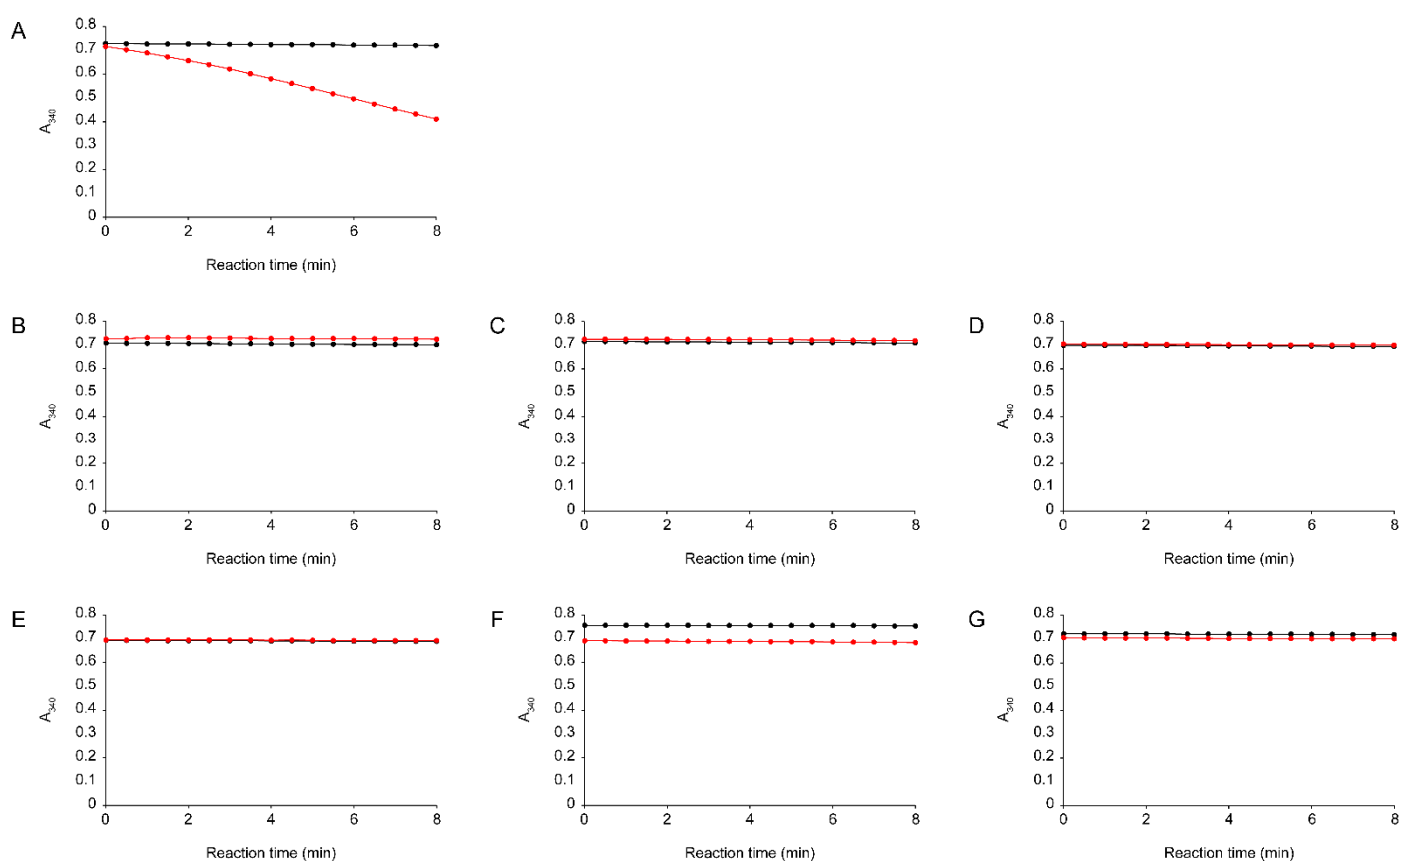

**Figure S2.** Oxyanion reduction activity of Trx system from *P. stutzeri* F2a. The activity towards selenite (A), selenate (B), sulfite (C), sulfate (D), thiosulfate (E), nitrite (F), and nitrate (G) was measured using PsTrxA with PsTrxR and NADPH by monitoring the decrease in  $A_{340}$  due to NADPH oxidation. The assay was performed with (red) or without (black) PsTrxA.

**Table S1.** Primers used in this study

| Primer names       | Primer sequences                              |
|--------------------|-----------------------------------------------|
| PsTrxA-f           | 5'-GGGAATTCCATATGAGCGACTACATCAACAATGTCAGCG-3' |
| PsTrxA-r           | 5'-CGCGGATCCTCAGATGTTGCTGTCGAGGAAGGC-3'       |
| PsTrxR-f           | 5'-GGGAATTCCATATGAGTGAAGTCAAGCATTCGCGTCTG-3'  |
| PsTrxR-r           | 5'-CGCGGATCCTCAATTGTCCAGGTACTTCTCGGCATC-3'    |
| PsTrxA_C33A-f      | 5'-ACTGGGCTGAGTGGGCTGGCCCCTGCAAGA-3'          |
| PsTrxA_C33A-r      | 5'-TCTTGCAGGGGCCAGCCCACTCAGCCCAGT-3'          |
| PsTrxA_C36A-f      | 5'-AGTGGTGTGGCCCCGCCAAGATGATCGCGC-3'          |
| PsTrxA_C36A-r      | 5'-GCGCGATCATCTTGGCGGGGCCACACCACT-3'          |
| PsTrxA_C33A/C36A-f | 5'-ACTGGGCTGAGTGGGCTGGCCCCGCCAAGA-3'          |
| PsTrxA_C33A/C36A-r | 5'-TCTTGGCGGGGCCAGCCCACTCAGCCCAGT-3'          |

## References

1. Edgar, R. C., MUSCLE: multiple sequence alignment with high accuracy and high throughput. *Nucleic Acids Res.* **2004**, *32*, (5), 1792-7.
